# Supplementary material for: Brain Laterality and Personality Traits: Assessing Handedness as a Proxy for Innate Neurological Differences between Individuals
Source: Preprints.org preprint supplement (doi:10.20944/preprints202312.2139.v1), 2023-12-28
Supplement: Supplementary file 1 [file supplementary]

**Appendix**

| Trait | Items | Key |
| --- | --- | --- |
| Extraversion | I am the life of the party. | + |
| Extraversion | I do not talk a lot. | - |
| Extraversion | I feel comfortable around people. | + |
| Extraversion | I keep in the background. | - |
| Extraversion | I start conversations. | + |
| Extraversion | I have little to say | - |
| Extraversion | I talk to a lot of different people at parties. | + |
| Extraversion | I do not like to draw attention to myself. | - |
| Extraversion | I do not mind being the centre of attention. | + |
| Extraversion | I am quiet around strangers. | - |
| Neuroticism | I get stressed out easily. | - |
| Neuroticism | I am relaxed most of the time. | + |
| Neuroticism | I worry about things. | - |
| Neuroticism | I seldom feel blue. | + |
| Neuroticism | I am easily disturbed. | - |
| Neuroticism | I get upset easily. | - |
| Neuroticism | I change my mood a lot. | - |
| Neuroticism | I have frequent mood swings. | - |
| Neuroticism | I get irritated easily. | - |
| Neuroticism | I often feel blue. | - |
| Agreeableness | I feel little concern for others. | - |
| Agreeableness | I am interested in people. | + |
| Agreeableness | I insult people. | - |
| Agreeableness | I sympathize with others' feelings. | + |
| Agreeableness | I am not interested in other people's problems. | - |
| Agreeableness | I have a soft heart. | + |
| Agreeableness | I am not really interested in others. | - |
| Agreeableness | I take time out for others. | + |
| Agreeableness | I feel others' emotions. | + |
| Agreeableness | I make people feel at ease. | + |
| Conscientiousness | I am always prepared. | + |
| Conscientiousness | I leave my belongings around. | - |
| Conscientiousness | I pay attention to details. | + |
| Conscientiousness | I make a mess of things. | - |
| Conscientiousness | I get chores done right away. | + |
| Conscientiousness | I often forget to put things back in their proper place. | - |
| Conscientiousness | I like order. | + |
| Conscientiousness | I shirk my duties. | - |
| Conscientiousness | I follow a schedule. | + |
| Conscientiousness | I am exacting in my work. | + |
| Openness | I have a rich vocabulary. | + |
| Openness | I have difficulty understanding abstract ideas. | - |
| Openness | I have a vivid imagination. | + |
| Openness | I am not interested in abstract ideas. | - |
| Openness | I have excellent ideas. | + |
| Openness | I do not have a good imagination. | - |
| Openness | I am quick to understand things. | + |
| Openness | I use difficult words. | + |
| Openness | I spend time reflecting on things. | + |
| Openness | I am full of ideas. | + |
